# Supplementary figures and images for: A hybrid self attentive linearized phrase structuredtransformer based RNN for financial sentenceanalysis with sentence level explainability
Source: Research Square preprint supplement (doi:10.21203/rs.3.rs-5656559/v1), 2025-04-28

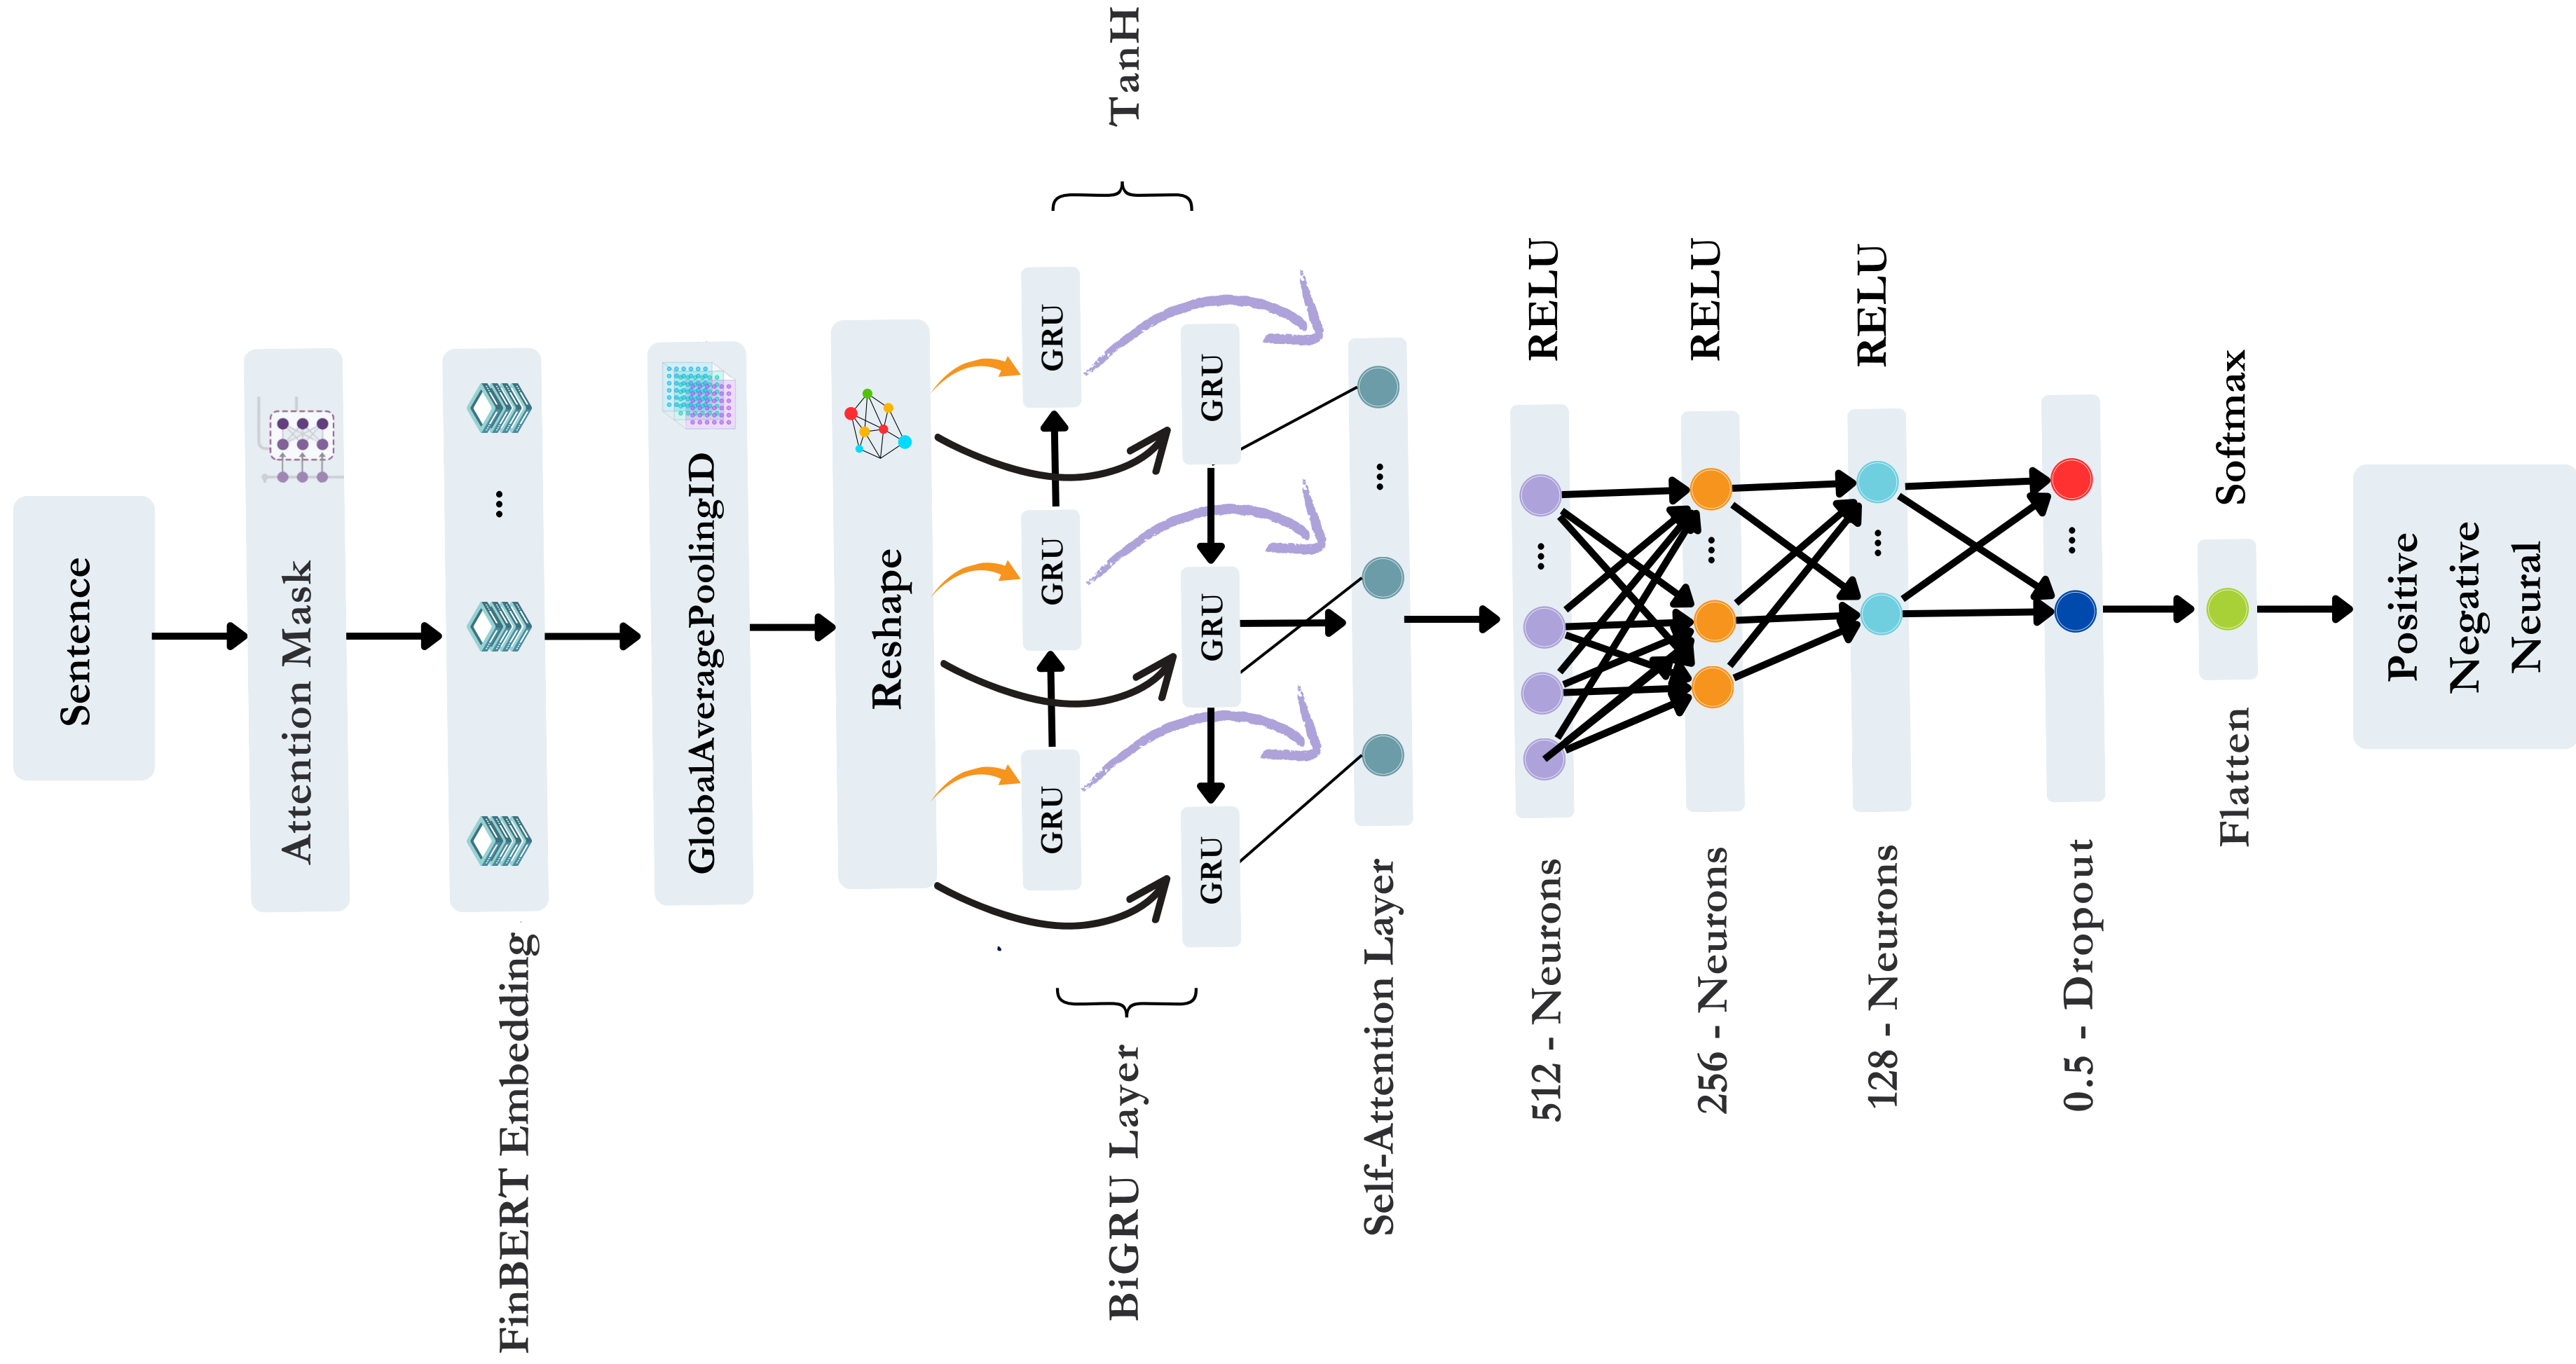

Supplement: Supplementary file 1 [file 11111.pdf › 11111.pdf]

$\mathcal{A}$  vs  $t$

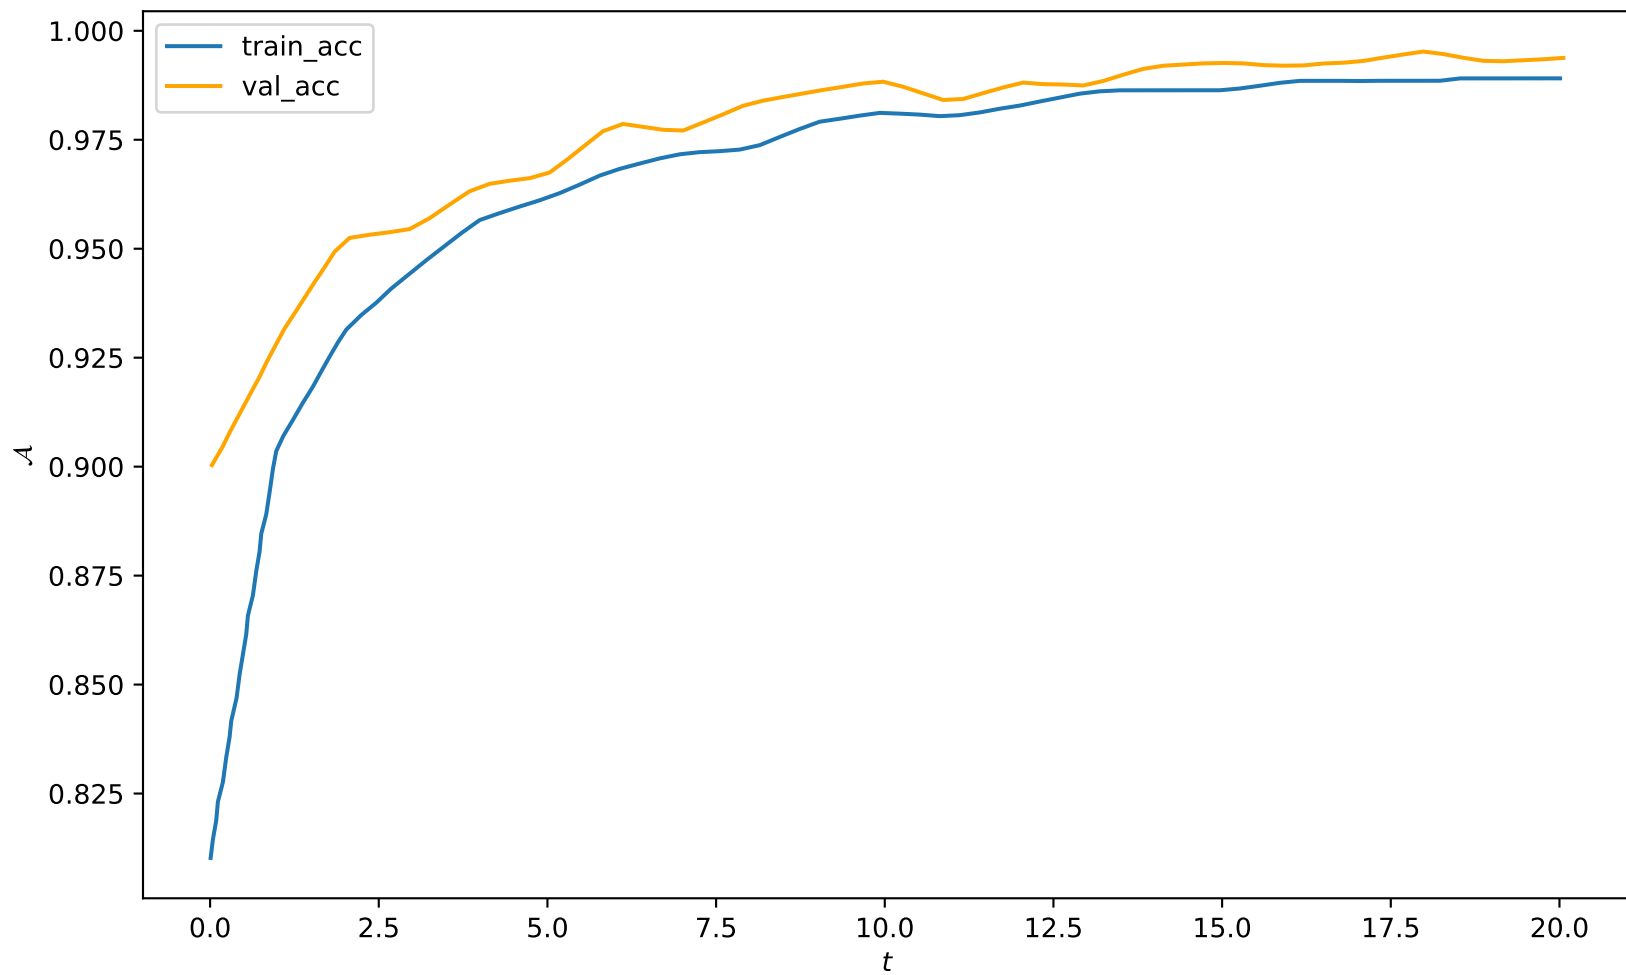

Supplement: Supplementary file 2 [file acc vs e.pdf › acc vs e.pdf]

$\mathcal{L}$  vs  $t$ 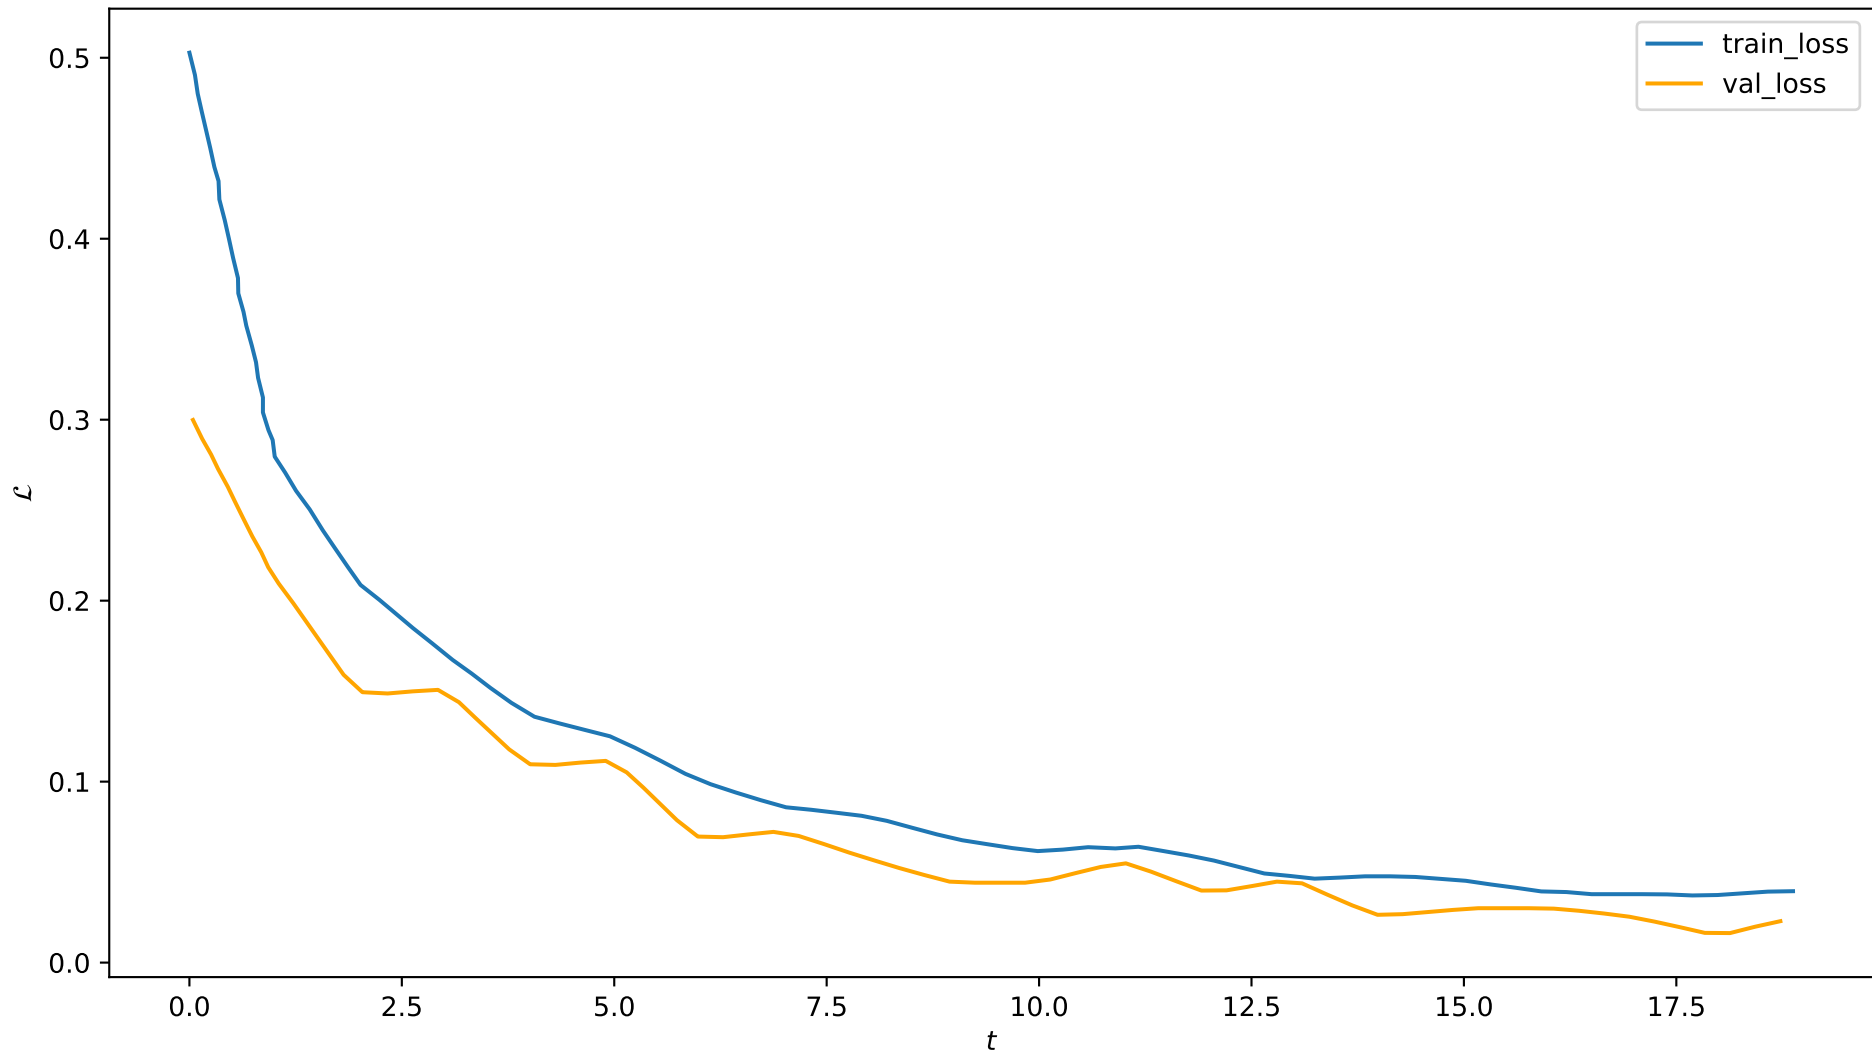

Supplement: Supplementary file 3 [file loss vs e.pdf › loss vs e.pdf]

$\eta$  vs  $t$

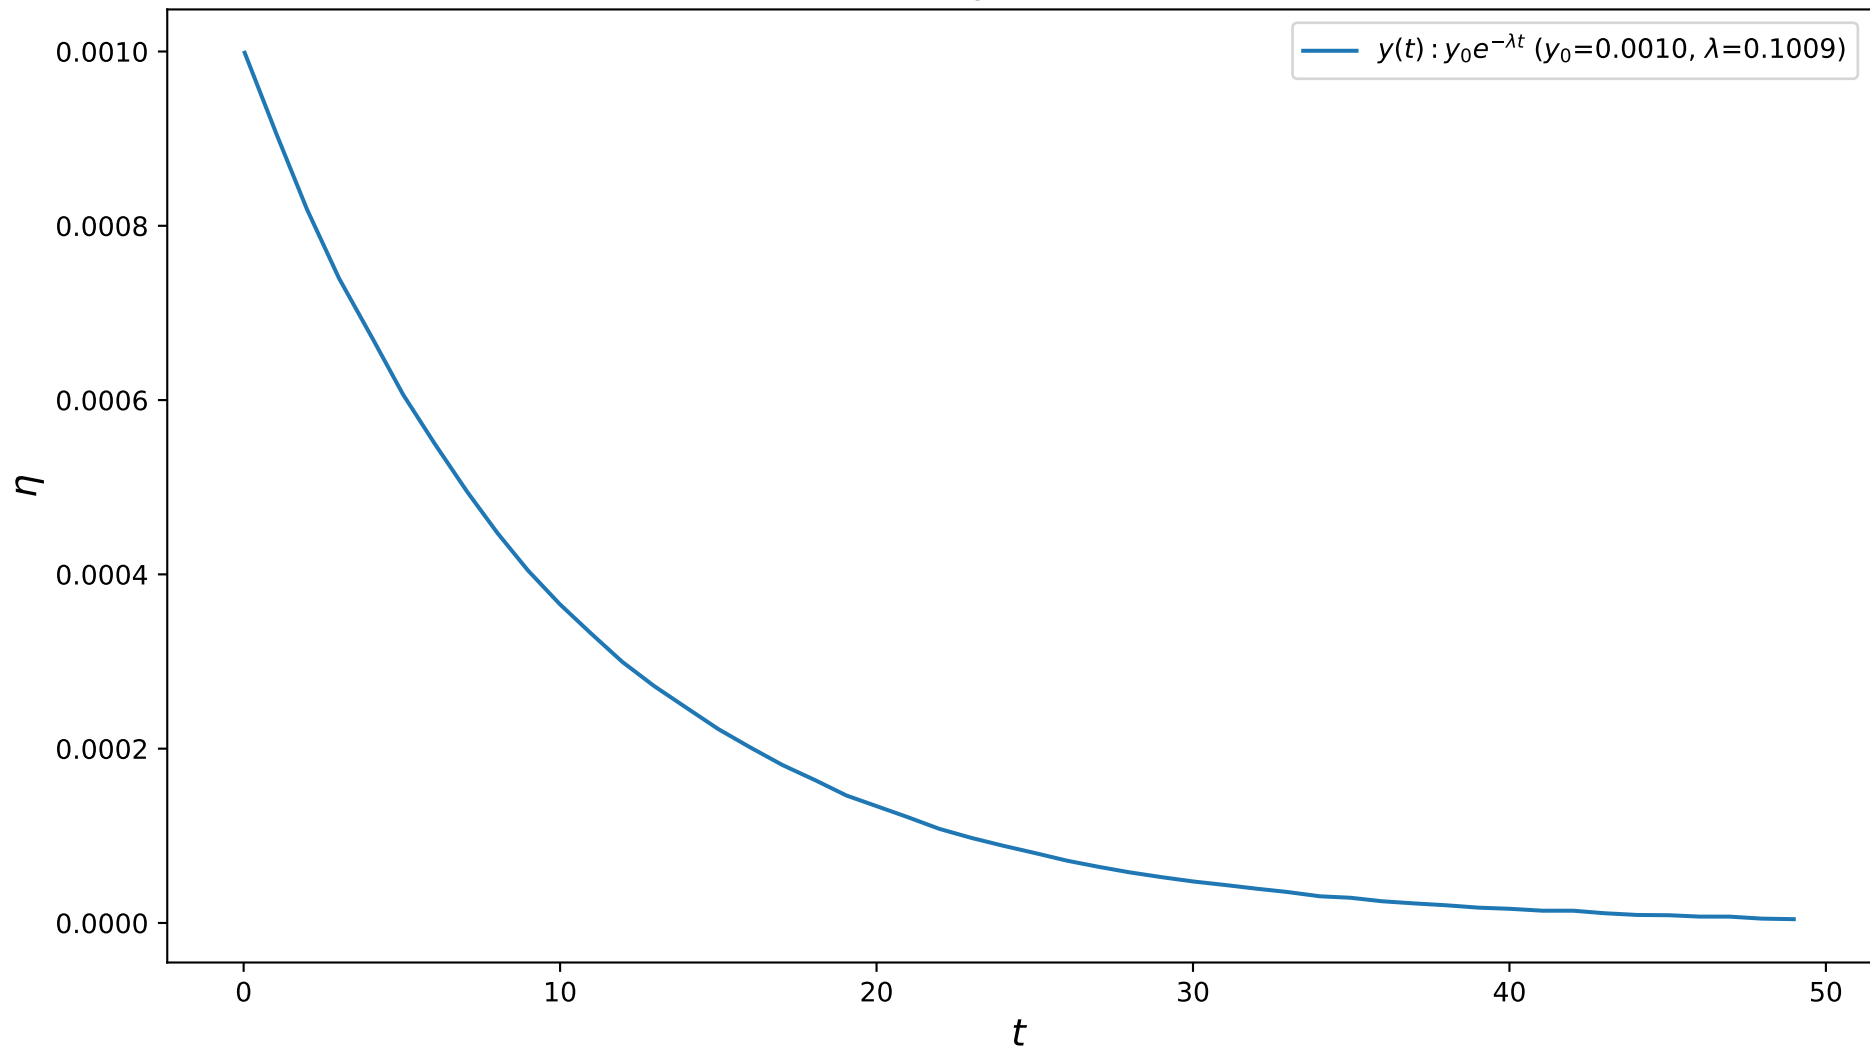

Supplement: Supplementary file 4 [file lr vs e.pdf › lr vs e.pdf]

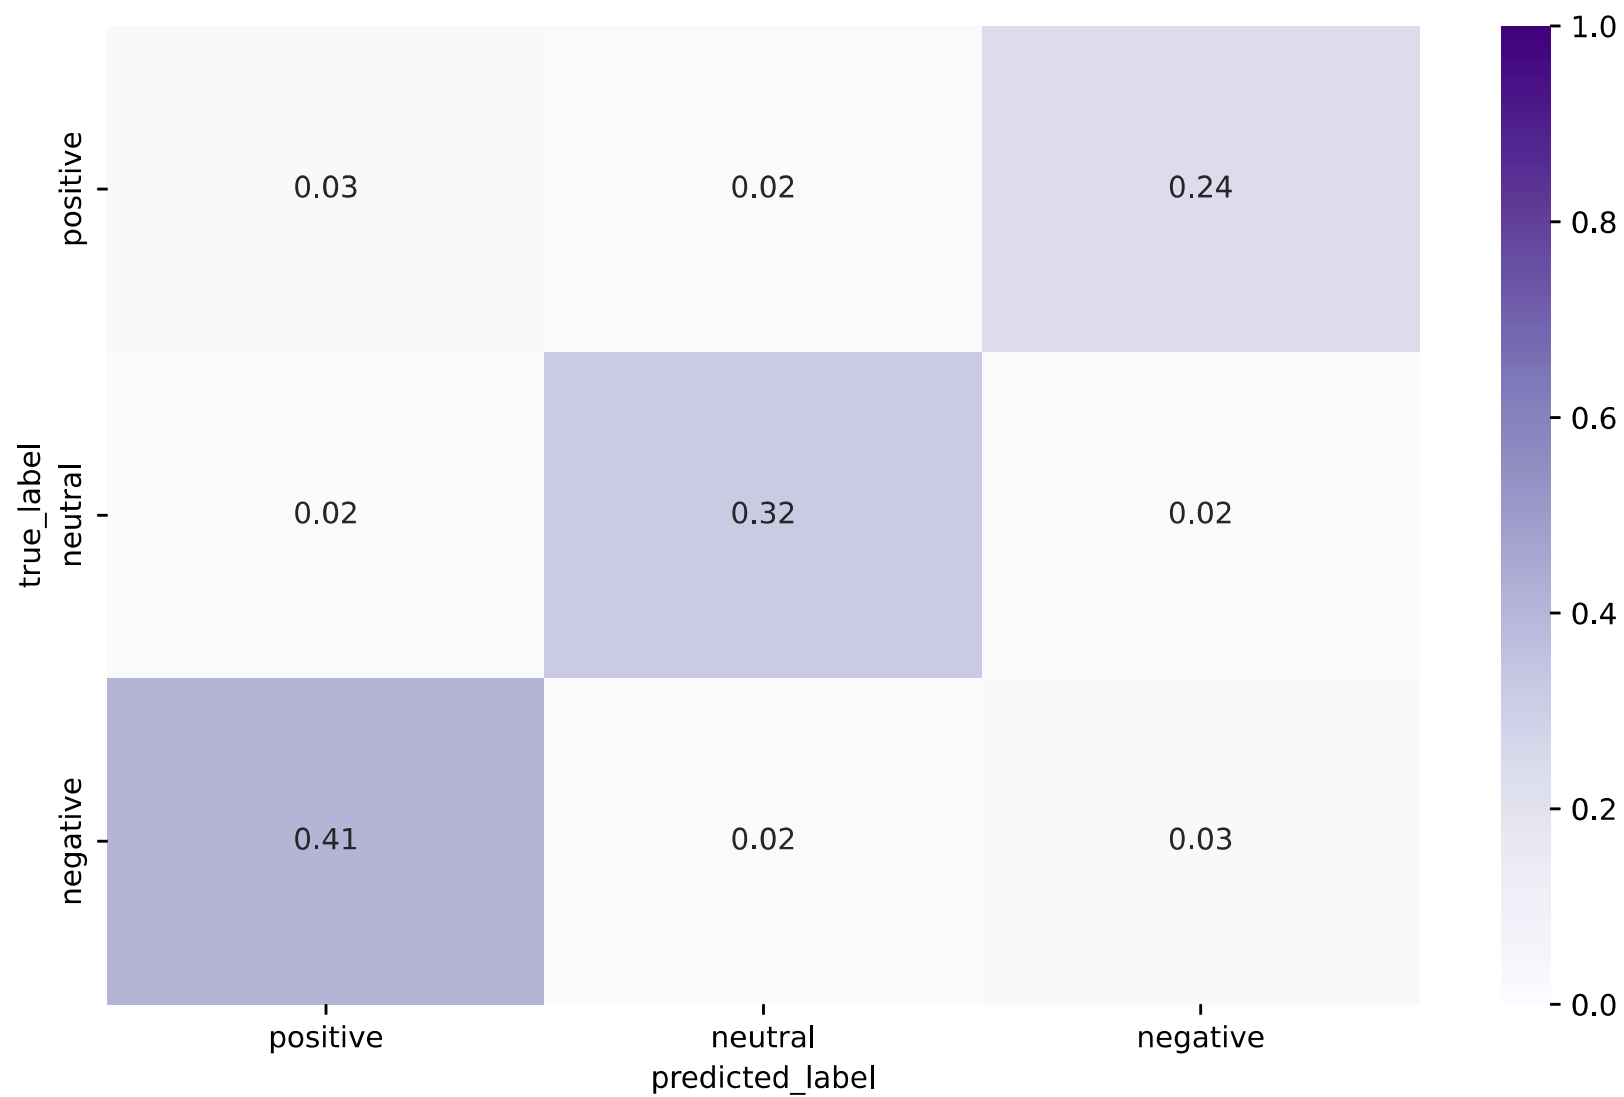

Supplement: Supplementary file 6 [file xFiTRNN CM.pdf › xFiTRNN CM.pdf]

(A = 95.86%)

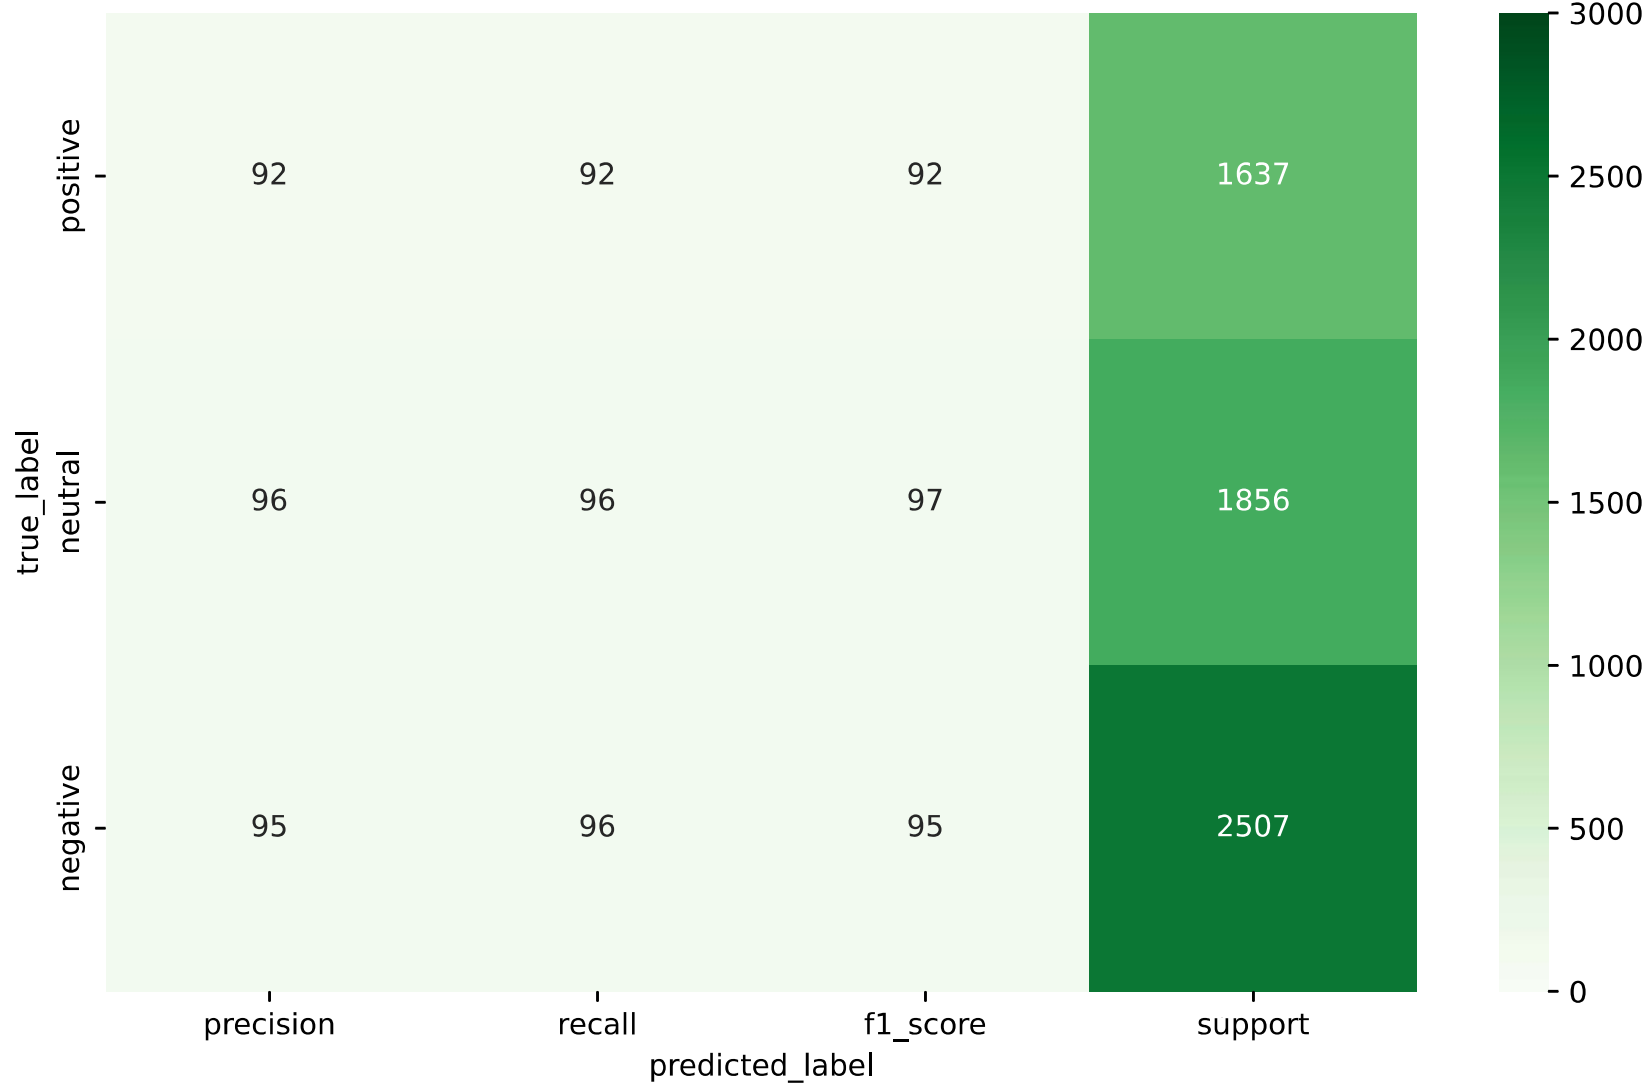

Supplement: Supplementary file 7 [file xFiTRNN M CM.pdf › xFiTRNN M CM.pdf]
